# Supplementary material for: Biochemical Estimation of Noncompliance with Smoking of Very Low Nicotine Content Cigarettes
Source: Oxford University Press journal article supplement (doi:10.1158/1055-9965.epi-14-1040), 2014-11-21
Supplement: 10559965epi141040-sup-137600_1_supp_2741647_nmxvxs.docx [file 10559965epi141040-sup-137600_1_supp_2741647_nmxvxs.docx]

Supplementary Table 1. Biochemical Measures of Compliance: Data from Individual Subjects

| Subject ID | PCot/CPD 6 Months | C/NC (2.4) | C/NC (4.2) | PCot/CPD ratio, VLNC/BL | C/NC (0.2) |
| --- | --- | --- | --- | --- | --- |
| 1 | 11.3 | NC | NC | 1.34 | NC |
| 2 | 2.83 | NC | C | 0.14 | C |
| 3 | 19.3 | NC | NC | 1.12 | NC |
| 4 | 1.42 | C | C | 0.16 | C |
| 5 | 0.51 | C | C | 0.06 | C |
| 6 | 1.69 | C | C | 0.17 | C |
| 7 | 11.0 | NC | NC | 0.93 | NC |
| 8 | 9.19 | NC | NC | 0.84 | NC |
| 9 | 36.4 | NC | NC | 1.78 | NC |
| 10 | 12.5 | NC | NC | 0.89 | NC |
| 11 | 14.2 | NC | NC | 1.24 | NC |
| 12 | 1.56 | C | C | 0.13 | C |
| 13 | 3.80 | NC | C | 0.50 | NC |
| 14 | 3.00 | NC | C | 0.42 | NC |
| 15 | 1.18 | C | C | 0.21 | NC |
| 16 | 4.60 | NC | NC | 0.52 | NC |
| 17 | 3.14 | NC | C | 0.37 | NC |
| 18 | 16.0 | NC | NC | 1.24 | NC |
| 19 | 12.9 | NC | NC | 1.19 | NC |
| 20 | 15.0 | NC | NC | 1.12 | NC |
| 21 | 1.09 | C | C | 0.12 | C |
| 22 | 13.5 | NC | NC | 2.40 | NC |
| 23 | 3.13 | NC | C | 0.14 | C |
| 24 | 1.47 | C | C | 0.12 | C |
| 25 | 2.50 | NC | C | 0.19 | C |
| 26 | 4.55 | NC | NC | 0.21 | NC |
| 27 | 21.0 | NC | NC | 2.35 | NC |
| 28 | 0.85 | C | C | 0.14 | C |
| 29 | 1.17 | C | C | 0.12 | C |
| 30 | 1.10 | C | C | 0.16 | C |
| 31 | 9.67 | NC | NC | 0.81 | NC |
| 32 | 0.90 | C | C | 0.13 | C |
| 33 | 0.78 | C | C | 0.12 | C |
| 34 | 2.17 | C | C | 0.33 | NC |
| 35 | 6.91 | NC | NC | 1.12 | NC |
| 36 | 2.27 | C | C | 0.24 | NC |
| 37 | 2.55 | NC | C | 0.22 | NC |
| 38 | 0.92 | C | C | 0.08 | C |
| 39 | 0.80 | C | C | 0.11 | C |
| 40 | 1.57 | C | C | 0.13 | C |
| 41 | 8.65 | NC | NC | 1.06 | NC |
| 42 | 3.60 | NC | C | 0.29 | NC |
| 43 | 6.33 | NC | NC | 0.49 | NC |
| 44 | 12.3 | NC | NC | 1.19 | NC |
| 45 | 5.45 | NC | NC | 0.58 | NC |
| 46 | 8.20 | NC | NC | 0.60 | NC |
| 47 | 1.90 | C | C | 0.18 | C |
| 48 | 3.19 | NC | C | 0.14 | C |
| 49 | 3.44 | NC | C | 0.23 | NC |
| 50 | 1.37 | C | C | 0.10 | C |

Note: C/NC indicates whether the biomarker indicated compliance or non-compliance
